# Supplementary material for: Microstructured Collagen Films for 3D Corneal Stroma Modelling
Source: Research Square preprint supplement (doi:10.21203/rs.3.rs-111886/v1), 2020-11-25

## Supplemental information

### Microstructured collagen films for 3D corneal stroma modelling

Juha Prittinen, Xin Zhou, Ludvig Backman and Patrik Danielson

#### Supplementary figure S1.

Photographs of the full-length western blots used in the figure 4.

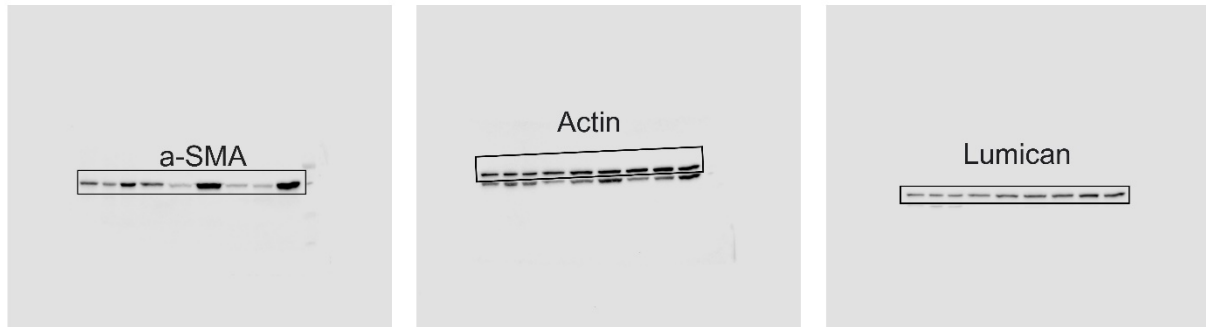

Supplement: Supplementary file 1 [file 825e54309336838cf62786b2.pdf]
